# Supplementary material for: Genetic Analysis of a Large-Scale Phaeocystis globosa Bloom Offshore Qingdao, China
Source: MDPI journal article supplement (doi:10.3390/microorganisms10091723), 2022-08-26
Supplement: s1 [file s1]

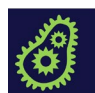**Table S1.** List of all samples and corresponding environmental factors.

| Sample Date      | Temperature | Salinity | PO <sub>4</sub> <sup>3-</sup> | NO <sub>3</sub> <sup>-</sup> | NO <sub>2</sub> <sup>-</sup> | NH <sub>4</sub> <sup>+</sup> | SiO <sub>3</sub> <sup>2-</sup> | PH   | Chlorophyll-A |
|------------------|-------------|----------|-------------------------------|------------------------------|------------------------------|------------------------------|--------------------------------|------|---------------|
| 03 December 2021 | 12.0        | NA       | NA                            | NA                           | NA                           | NA                           | NA                             | NA   | NA            |
| 08 December 2021 | 11.9        | 29.3     | 5.05                          | 65.40                        | 7.47                         | 48.49                        | 17.37                          | 8.46 | 0.954         |
| 11 December 2021 | 11.0        | 28.2     | 3.78                          | 63.74                        | 2.29                         | 47.26                        | 6.82                           | 8.77 | 1.095         |
| 16 December 2021 | 10.8        | 28.2     | 5.01                          | 86.03                        | 4.24                         | 61.34                        | 19.22                          | 8.54 | 0.370         |
| 21 December 2021 | 9.4         | 27.0     | 5.07                          | 47.96                        | 7.47                         | 161.97                       | 12.16                          | 8.51 | 0.665         |
| 26 December 2021 | 6.6         | 29.6     | 5.33                          | 70.27                        | 2.00                         | 33.24                        | 18.12                          | 8.49 | 0.388         |
| 31 December 2021 | 6.8         | 28.4     | 7.42                          | 90.78                        | 3.90                         | 50.22                        | 20.27                          | 8.03 | 0.477         |

NA: Missing data.
